# Supplementary material for: Assessing microvascular invasion in HBV-related hepatocellular carcinoma: an online interactive nomogram integrating inflammatory markers, radiomics, and convolutional neural networks
Source: PubMed Central journal article supplement (PMC11439624; doi:10.3389/fonc.2024.1401095), 2024-09-16
Supplement: DataSheet1.pdf [file DataSheet1.pdf]

**TableS1. Comparisons of patients characteristics in training and validation datasets**

| Characteristics                  | Training dataset (n = 120) | Validation dataset (n = 53) | P                |
|----------------------------------|----------------------------|-----------------------------|------------------|
| MVI                              |                            |                             | 0.968            |
| Positive                         | 57                         | 25                          |                  |
| Negative                         | 63                         | 28                          |                  |
| Age, years                       |                            |                             | <b>0.002</b>     |
| < 35                             | 5                          | 2                           |                  |
| 35-65                            | 64                         | 43                          |                  |
| ≥ 65                             | 51                         | 8                           |                  |
| Gender                           |                            |                             | 0.151            |
| Male                             | 13                         | 43                          |                  |
| Female                           | 13                         | 10                          |                  |
| BMI                              |                            |                             | 0.061            |
| < 18.5                           | 8                          | 2                           |                  |
| 18.5-25                          | 63                         | 38                          |                  |
| ≥ 25                             | 49                         | 13                          |                  |
| α-Fetoprotein                    |                            |                             | 0.792            |
| < 20 ng/mL                       | 54                         | 25                          |                  |
| ≥20ng/mL                         | 66                         | 28                          |                  |
| Edmondson-Steiner Grade          |                            |                             | 0.100            |
| I                                | 18                         | 2                           |                  |
| II                               | 74                         | 38                          |                  |
| III                              | 28                         | 13                          |                  |
| Cirrhosis of background liver    |                            |                             | 0.625            |
| Absent                           | 37                         | 18                          |                  |
| Present                          | 83                         | 34                          |                  |
| Serum albumin                    |                            |                             | 0.898            |
| < 35 g/L                         | 15                         | 7                           |                  |
| ≥35 g/L                          | 105                        | 46                          |                  |
| Alanine transaminase             |                            |                             | 0.325            |
| < 40 U/L                         | 73                         | 28                          |                  |
| ≥ 40 U/L                         | 47                         | 25                          |                  |
| Aspartate transaminase           |                            |                             | <b>0.014</b>     |
| < 40 U/L                         | 70                         | 31                          |                  |
| ≥ 40 U/L                         | 50                         | 22                          |                  |
| Total billrubin                  |                            |                             | 0.444            |
| < 21 μmol/L                      | 96                         | 45                          |                  |
| ≥ 21 μmol/L                      | 24                         | 8                           |                  |
| γ-Glutamyltransferase            |                            |                             | <b>&lt;0.001</b> |
| < 60 U/L                         | 23                         | 24                          |                  |
| ≥ 60 U/L                         | 97                         | 29                          |                  |
| Neutrophils, 10 <sup>9</sup> /L* | 3.39±1.76                  | 3.18±1.37                   | 0.422            |
| Lymphocyte, 10 <sup>9</sup> /L*  | 1.68±0.56                  | 1.71±0.70                   | 0.816            |
| Hemoglobin, g/L*                 | 141±14                     | 140±15                      | 0.370            |
| Platelet,10 <sup>9</sup> /L*     | 175±70                     | 183±73                      | 0.461            |
| Tumor size                       |                            |                             | <b>&lt;0.001</b> |
| < 5cm                            | 88                         | 23                          |                  |
| ≥ 5cm                            | 32                         | 30                          |                  |
| Tumor margin                     |                            |                             | 0.203            |
| Smooth margin                    | 31                         | 9                           |                  |
| Non-smooth margin                | 89                         | 44                          |                  |

|                                         |    |    |              |
|-----------------------------------------|----|----|--------------|
| Enhancement pattern                     |    |    | 0.437        |
| Typical                                 | 49 | 25 |              |
| Atypical                                | 71 | 28 |              |
| Peritumoral enhancement on artery phase |    |    | 0.225        |
| Absent                                  | 73 | 27 |              |
| Present                                 | 47 | 26 |              |
| Radiologic capsule on delay phase       |    |    | <b>0.028</b> |
| Absent                                  | 80 | 26 |              |
| Present                                 | 40 | 27 |              |
| Peritumoral hypointensity               |    |    | 0.989        |
| Absent                                  | 59 | 26 |              |
| Present                                 | 61 | 27 |              |

---
